# Supplementary material for: High volumetric energy density annealed-MXene-nickel oxide/MXene asymmetric supercapacitor
Source: Royal Society of Chemistry journal article supplement (doi:10.1039/c6ra27880a), 2017-01-01
Supplement: c6ra27880a1.pdf [file c6ra27880a1.pdf]

## **High Volumetric Energy Density Annealed-MXene-Nickel Oxide/MXene Asymmetric Supercapacitor**

Qi Xun Xia <sup>a</sup>, Jianjian Fu <sup>a</sup>, Je Moon Yun<sup>\*,b</sup>, Rajaram S. Mane<sup>b</sup>, and Kwang Ho Kim<sup>\*,a,b</sup>

*<sup>a</sup>School of Materials Science and Engineering, Pusan National University, San 30 Jangjeon-dong, Geumjeong-gu, Busan 609-735, Republic of Korea*

*<sup>b</sup>Global Frontier R&D Center for Hybrid Interface Materials, Pusan National University, San 30 Jangjeon-dong, Geumjeong-gu, Busan 609-735, Republic of Korea*

\*Email: \* [kwhokim@pusan.ac.kr](mailto:kwhokim@pusan.ac.kr) (K. H. Kim, Prof.)

\* [yunjemoon@gmail.com](mailto:yunjemoon@gmail.com) (J. M. Yun, Dr.)

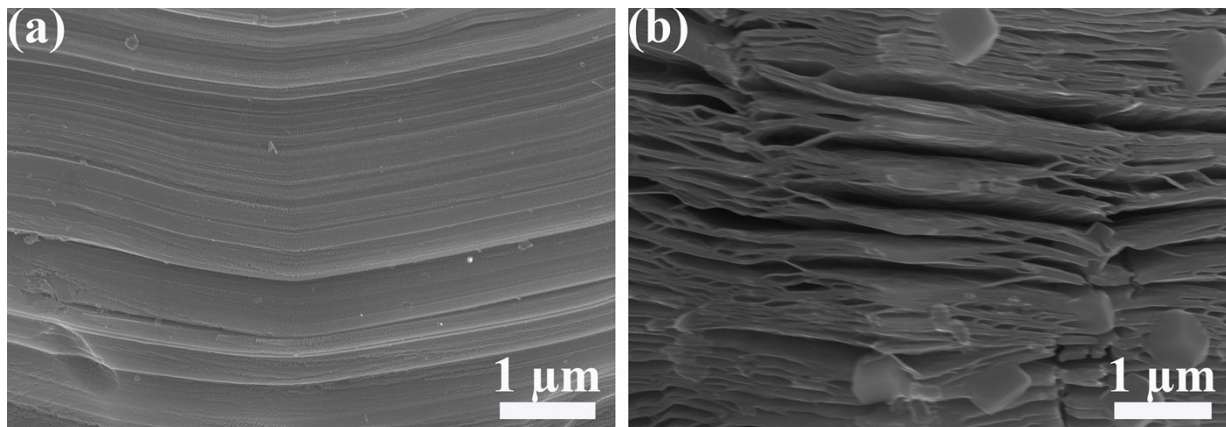

**Figure S1.** SEM images of the (a) as-obtained before HF treatment  $\text{Ti}_3\text{AlC}_2$  MAX phase, and (b) after HF treatment  $\text{Ti}_3\text{C}_2\text{T}_x$  MXene.

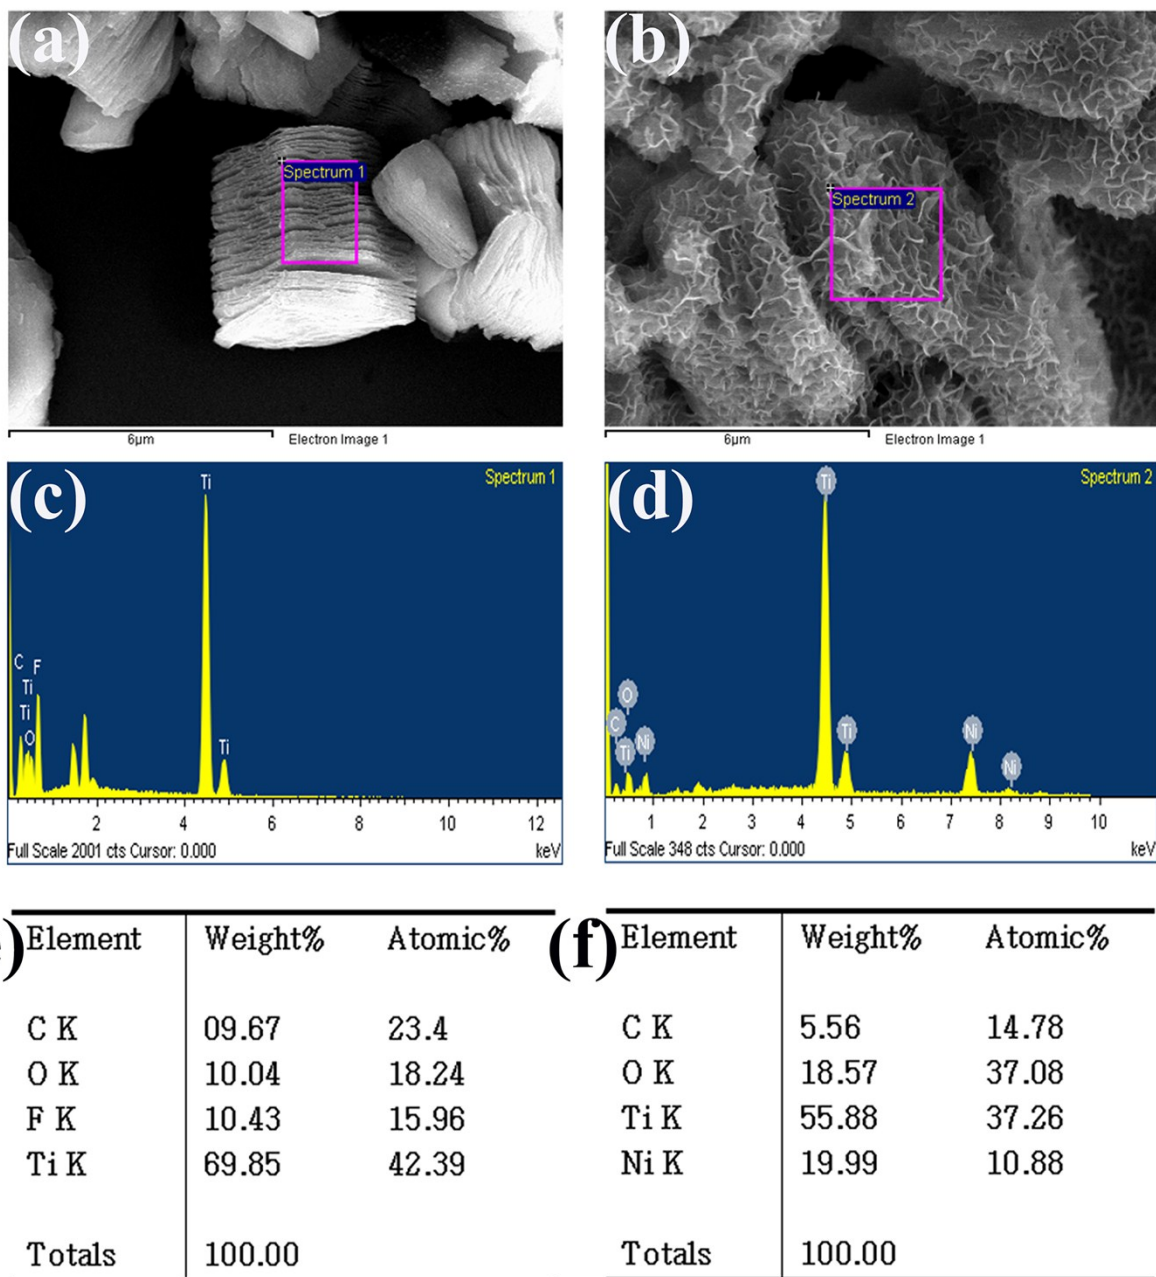

**Figure S2.** (a) SEM images of the  $\text{Ti}_3\text{C}_2\text{T}_x$  MXene with corresponding selected-area EDX spectrum (c), and (e) corresponding elements content. (b) SEM images of the Ni-dMXNC with corresponding selected-area EDX spectrum (d), and (f) corresponding elements content.

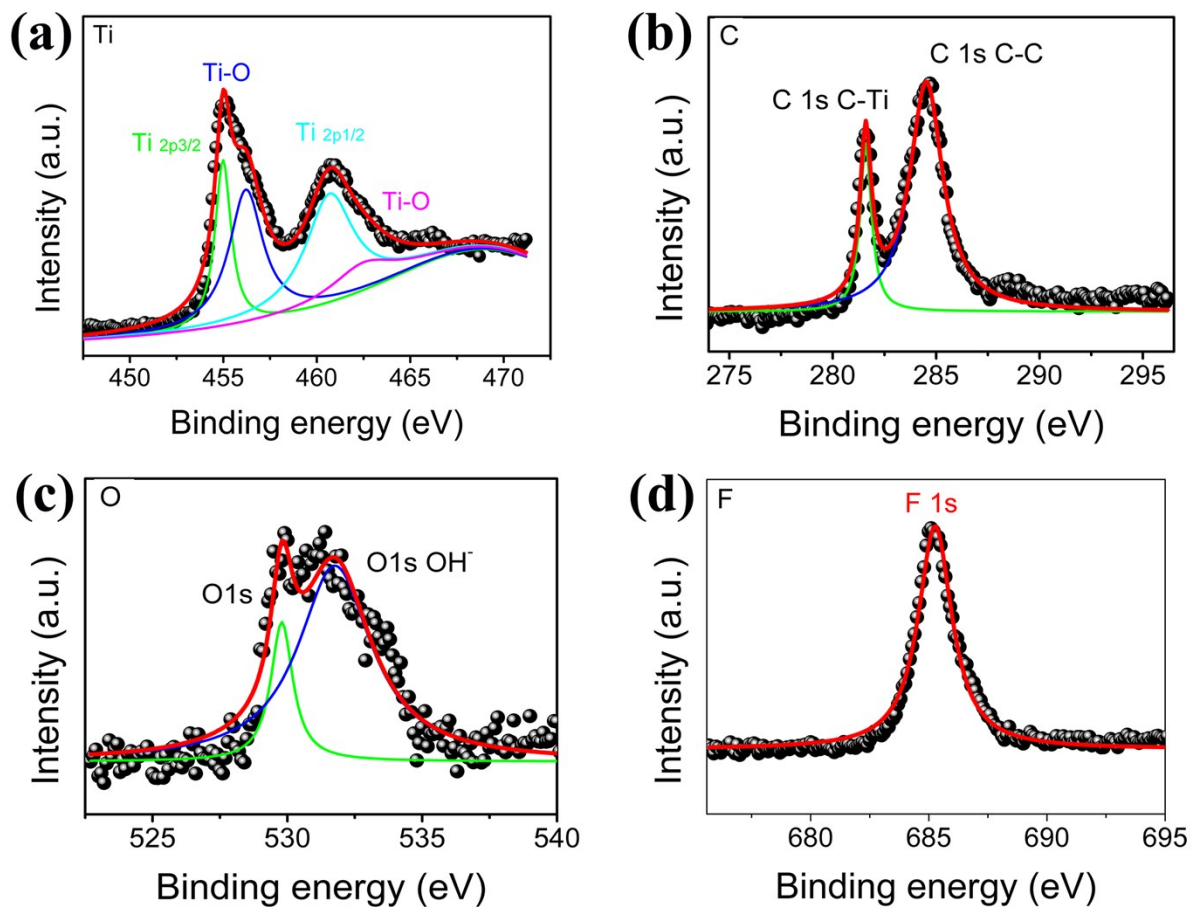

**Figure S3.** High-resolution XPS spectra (a) Ti 2p, (c) C 1s, (d) Ni 2p, (e) O 1s, and (f) F 1s spectra of  $\text{Ti}_3\text{C}_2\text{T}_x$  MXene.

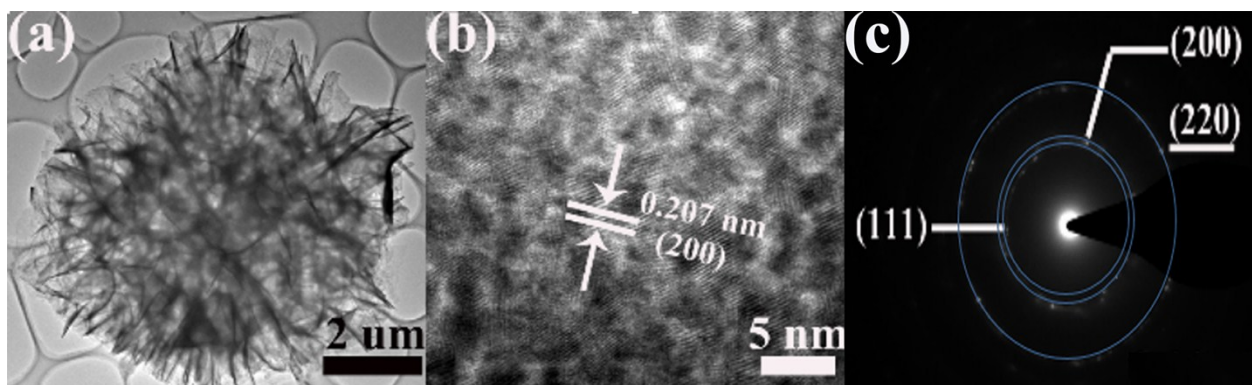

**Figure S4.** (a) Low magnification TEM image, (b) HRTEM image and (c) corresponding SAED pattern of the NiO nanosheets.

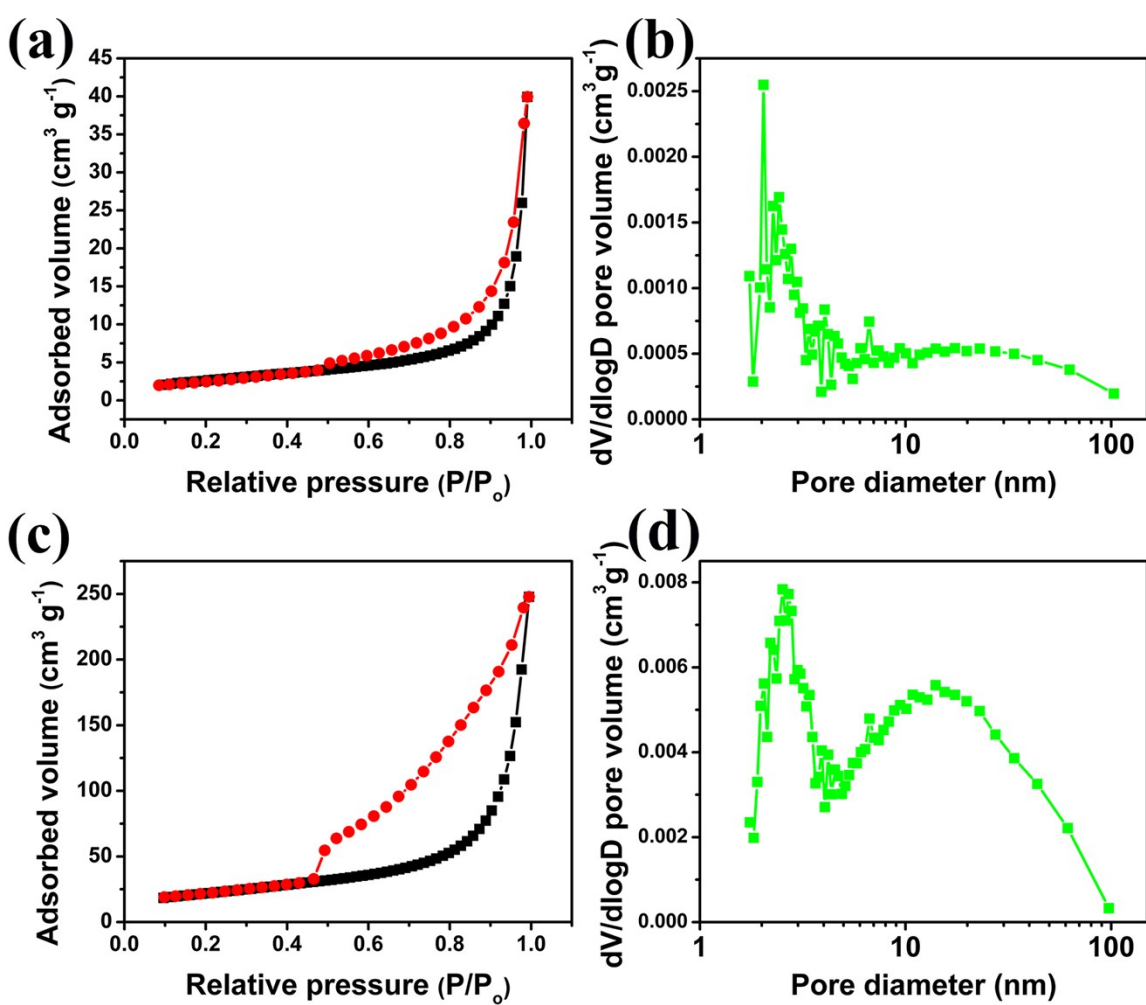

**Figure S5.** Pore structure of  $\text{Ti}_3\text{C}_2\text{T}_x$  MXene and Ni-dMXNC (a) Nitrogen adsorption-desorption isotherms and (b) the BHJ pore-size distribution of the  $\text{Ti}_3\text{C}_2\text{T}_x$  MXene; (c) Nitrogen adsorption-desorption isotherms and (d) the BHJ pore-size distribution of the Ni-dMXNC.

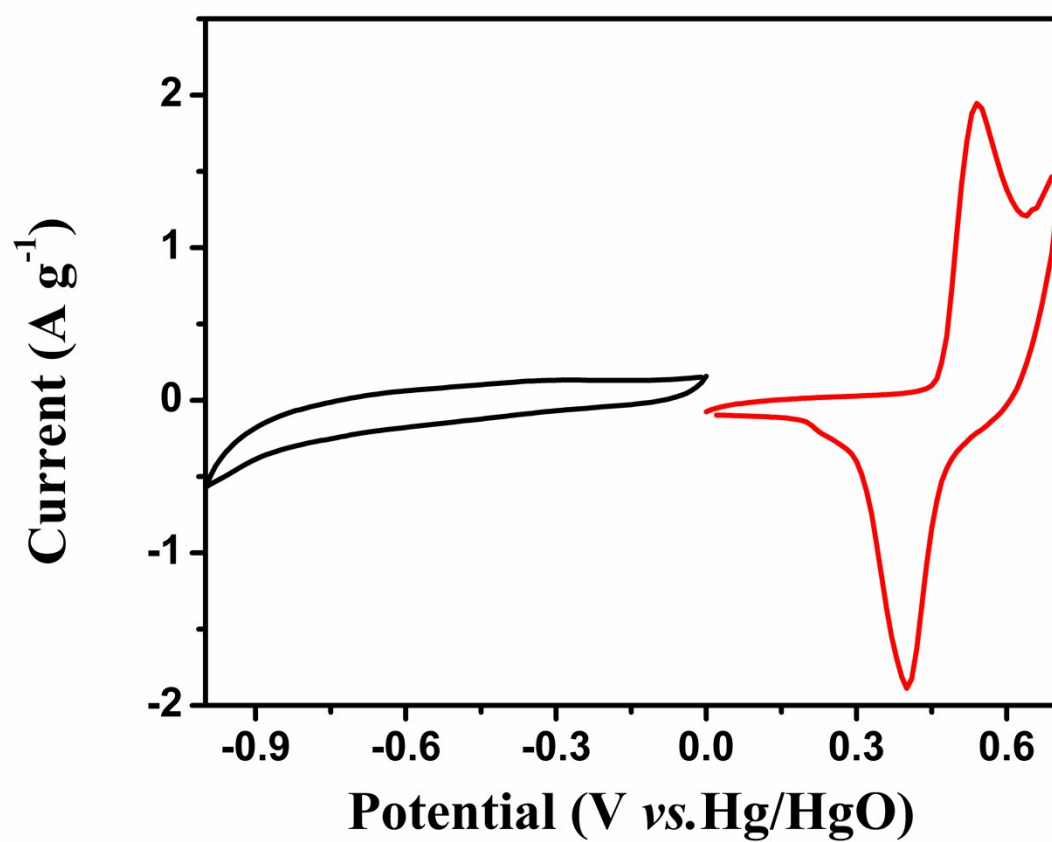

**Figure S6.** CV curves of the Ti<sub>3</sub>C<sub>2</sub>T<sub>x</sub> MXene electrodes in different potential range at scan rate of 10 mV s<sup>-1</sup>.

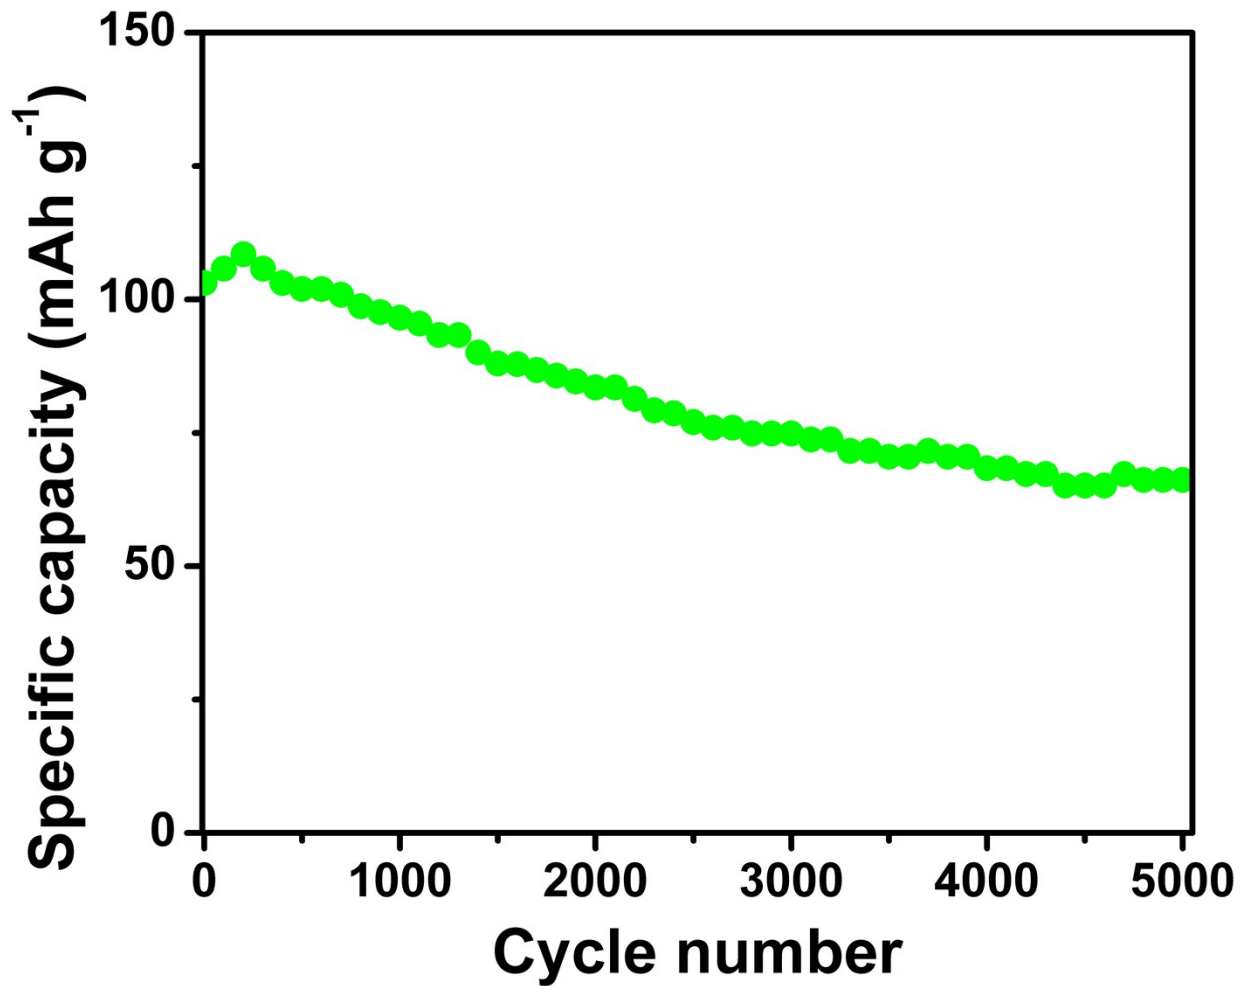

Figure S7. Cycling performance of the NiO electrode at a current density of 5 A g<sup>-1</sup>.



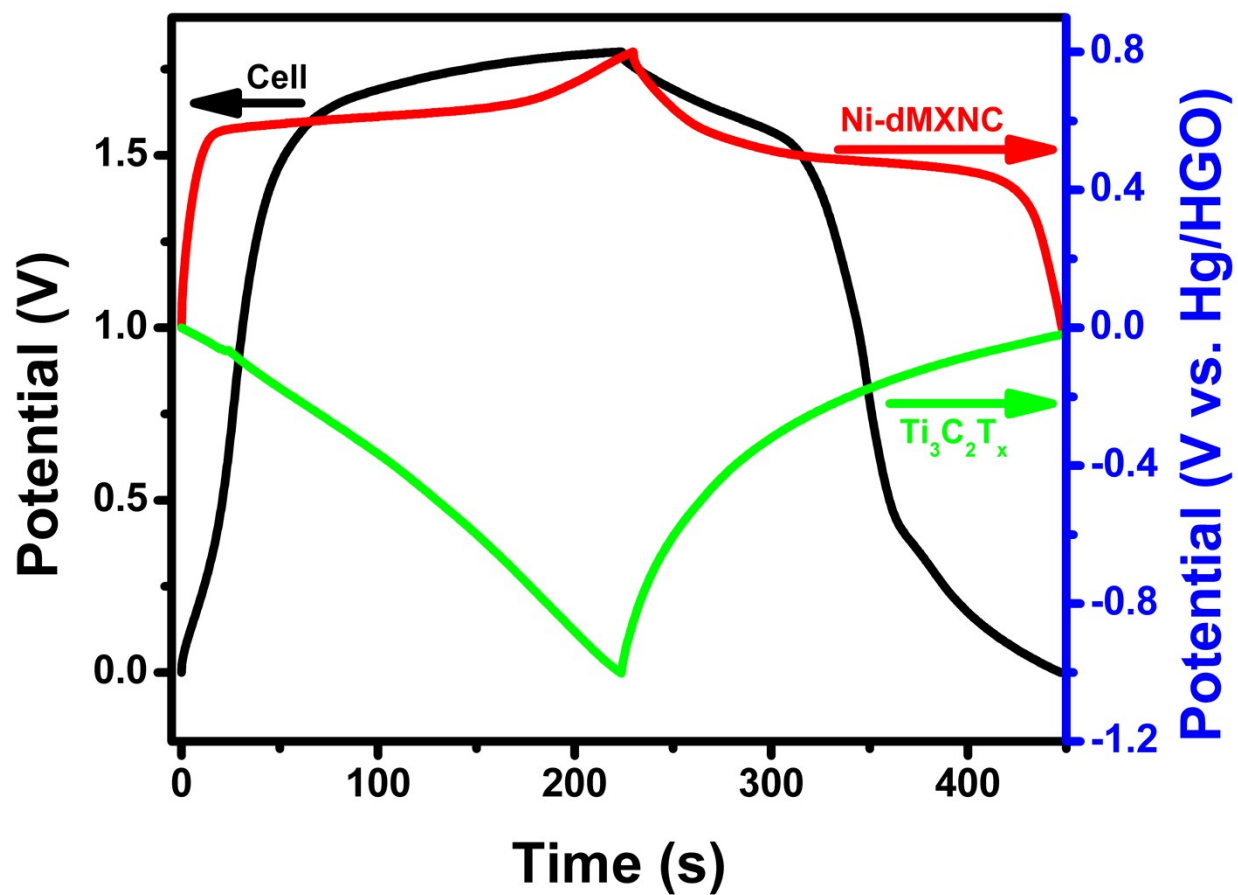

**Figure S8.** Galvanostatic charge-discharge curves of the asymmetric cell and the in situ tracked variation of the potential in each individual electrode.

**Table S1.** Resistivity of the  $\text{Ti}_3\text{C}_2\text{T}_x$  MXene and Ni-dMXNC materials.

| Sample                            | Resistivity ( $\Omega/\square$ ) | Resistivity ( $\Omega \text{ m}$ ) |
|-----------------------------------|----------------------------------|------------------------------------|
| $\text{Ti}_3\text{C}_2\text{T}_x$ | 1.54E+4                          | 6.76E+2                            |
| Ni-dMXNC                          | 4.71E+3                          | 3.30E+2                            |

**Table S2.** Comparison of maximum gravimetric capacitance and volumetric capacitance of the reported MXene-based materials and the present work.

| Positive electrodes                                                            | $C_s$ (F g <sup>-1</sup> )    | $C_s$ (F cm <sup>-3</sup> )     | Electrolyte                        | Ref.      |
|--------------------------------------------------------------------------------|-------------------------------|---------------------------------|------------------------------------|-----------|
| Ti <sub>3</sub> C <sub>2</sub> T <sub>x</sub>                                  |                               | 360 (2 mV s <sup>-1</sup> )     | 1 M MgSO <sub>4</sub>              | [1]       |
| Ti <sub>3</sub> C <sub>2</sub> T <sub>x</sub>                                  | 53 (2 mV s <sup>-1</sup> )    |                                 | 0.05 M LiCl                        | [2]       |
| Ti <sub>3</sub> C <sub>2</sub> T <sub>x</sub>                                  |                               | 49.6 (0.63 A cm <sup>-3</sup> ) | 1 M H <sub>2</sub> SO <sub>4</sub> | [3]       |
| Ti <sub>3</sub> C <sub>2</sub>                                                 | 71.2 (2.5A/g)                 | 119.8 (2.5A/g)                  | 3 M KOH                            | [4]       |
| Ti <sub>3</sub> C <sub>2</sub> -1.8                                            | 117 (2 mV s <sup>-1</sup> )   |                                 | 1 M KOH                            | [5]       |
| Ti <sub>3</sub> C <sub>2</sub> T <sub>x</sub> paper                            |                               | 442 (2 mV s <sup>-1</sup> )     | 1 M KOH                            | [6]       |
| <i>d</i> -Ti <sub>3</sub> C <sub>2</sub>                                       |                               | 520 (2 mV s <sup>-1</sup> )     | 1 M H <sub>2</sub> SO <sub>4</sub> | [7]       |
| Ti <sub>3</sub> C <sub>2</sub> T <sub>x</sub> -XAS                             | 230 (1 mV s <sup>-1</sup> )   |                                 | 1 M H <sub>2</sub> SO <sub>4</sub> | [8]       |
| Ti <sub>3</sub> C <sub>2</sub> T <sub>x</sub> hydrogel                         | 70 (20 mV s <sup>-1</sup> )   |                                 | Neat EMI-TFSI                      | [9]       |
| Ti <sub>3</sub> C <sub>2</sub> T <sub>x</sub> clay                             | 245 (2 mV s <sup>-1</sup> )   | 900 (2 mV s <sup>-1</sup> )     | 1 M H <sub>2</sub> SO <sub>4</sub> | [10]      |
| Ti <sub>3</sub> C <sub>2</sub> T <sub>x</sub> MXene film                       | 499 (2 mV s <sup>-1</sup> )   | 226 (2 mV s <sup>-1</sup> )     | 1 M H <sub>2</sub> SO <sub>4</sub> | [11]      |
| Ti <sub>3</sub> C <sub>2</sub> /CNT                                            | 85 (2 mV s <sup>-1</sup> )    | 245 (2 mV s <sup>-1</sup> )     | 1 M EMITFSI                        | [12]      |
| <i>d</i> -Ti <sub>3</sub> C <sub>2</sub> T <sub>x</sub> /CNT                   | 193.5 (5 mVs <sup>-1</sup> )  | 393 (5 mVs <sup>-1</sup> )      | 6 M KOH                            | [13]      |
| Sandwich Ti <sub>3</sub> C <sub>2</sub> T <sub>x</sub> /CNT                    |                               | 390 (2 mV s <sup>-1</sup> )     | 1 M MgSO <sub>4</sub>              | [1]       |
| Sandwich Ti <sub>3</sub> C <sub>2</sub> T <sub>x</sub> /rGO                    |                               | 435 (2 mV s <sup>-1</sup> )     | 1 M MgSO <sub>4</sub>              | [1]       |
| Sandwich Ti <sub>3</sub> C <sub>2</sub> T <sub>x</sub> /MWCNT                  |                               | 321 (2 mV s <sup>-1</sup> )     | 1 M MgSO <sub>4</sub>              | [1]       |
| Nb <sub>2</sub> CT <sub>x</sub> /CNT paper                                     | 165 (5 mVs <sup>-1</sup> )    | 325 (5 mVs <sup>-1</sup> )      | 1 M LiPF <sub>6</sub>              | [14]      |
| Mo <sub>2</sub> CT <sub>x</sub>                                                | 196 (2 mV s <sup>-1</sup> )   | 700 (2 mV s <sup>-1</sup> )     | 1 M H <sub>2</sub> SO <sub>4</sub> | [15]      |
| Ti <sub>2</sub> CT <sub>x</sub> //Ti <sub>2</sub> CT <sub>x</sub> symmetric SC | 51 (1 mV s <sup>-1</sup> )    |                                 | 30 % KOH                           | [16]      |
| V <sub>2</sub> CT <sub>x</sub> /hard carbon                                    | 100 (0.2 mV s <sup>-1</sup> ) | 170 (0.2 mV s <sup>-1</sup> )   | 1 M NaPE6                          | [17]      |
| Ni-dMXNC                                                                       | 273.2 (1 A g <sup>-1</sup> )  | 819.6 (1 A g <sup>-1</sup> )    | 1 M KOH                            | This work |

## References

1. M. Q. Zhao, C. E. Ren, Z. Ling, M. R. Lukatskaya, C. Zhang, K. L. Van Aken, M. W. Barsoum and Y. Gogotsi, *Adv. Mater.*, 2015, **27**, 339-345.
2. M. D. Levi, M. R. Lukatskaya, S. Sigalov, M. Beidaghi, N. Shpigel, L. Daikhin, D. Aurbach, M. W. Barsoum and Y. Gogotsi, *Adv. Energy Materials*, 2015, **5**, 1400815.
3. B. S. Shen, H. Wang, L. J. Wu, R. S. Guo, Q. Huang and X. B. Yanx, *Chin. Chem. Lett.*, 2016, **04**, 012.
4. Y. Gao, L. Wang, Z. Li, Y. Zhang, B. Xing, C. Zhang and A. Zhou, *J. Adv. Ceram.*, 2015, **4**, 130-134.
5. S. Y. Lin and X. Zhang, *J. Power Sources*, 2015, **294**, 354-359.
6. M. R. Lukatskaya, O. Mashtalir, C. E. Ren, Y. Dall'Agnesse, P. Rozier, P. L. Taberna, M. Naguib, P. Simon, M. W. Barsoum and Y. Gogotsi, *Science*, 2013, **341**, 1502-1505.
7. Y. Dall'Agnesse, M. R. Lukatskaya, K. M. Cook, P. L. Taberna, Y. Gogotsi and P. Simon, *Electrochem. Commun.*, 2014, **48**, 118-122.
8. M. R. Lukatskaya, S. M. Bak, X. Yu, X. Q. Yang, M. W. Barsoum and Y. Gogotsi, *Adv. Energy Materials*, 2015, **5**, 1500589.
9. Z. Lin, D. Barbara, P. L. Taberna, K. L. Van Aken, B. Anasori, Y. Gogotsi and P. Simon, *J. Power Sources*, 2016.
10. M. Ghidui, M. R. Lukatskaya, M. Q. Zhao, Y. Gogotsi and M. W. Barsoum, *Nature*, 2014, **516**, 78-81.
11. M. Hu, Z. Li, H. Zhang, T. Hu, C. Zhang, Z. Wu and X. Wang, *Chem. Commun.*, 2015, **51**, 13531-13533.
12. Y. Dall'Agnesse, P. Rozier, P. L. Taberna, Y. Gogotsi and P. Simon, *J. Power Sources*, 2016, **306**, 510-515.
13. P. Yan, R. Zhang, J. Jia, C. Wu, A. Zhou, J. Xu and X. Zhang, *J. Power Sources*, 2015, **284**,

38-43.

14. O. Mashtalir, M. R. Lukatskaya, M. Q. Zhao, M. W. Barsoum and Y. Gogotsi, *Adv. Mater.*, 2015, **27**, 3501-3506.
15. J. Halim, S. Kota, M. R. Lukatskaya, M. Naguib, M. Q. Zhao, E. J. Moon, J. Pitock, J. Nanda, S. J. May and Y. Gogotsi, *Adv. Funct. Mater.*, 2016, **26**, 3118-3127.
16. R. Rakhi, B. Ahmed, M. Hedhili, D. H. Anjum and H. N. Alshareef, *Chem. Mater.*, 2015, **27**, 5314-5323.
17. Y. Dall'Agnese, P. L. Taberna, Y. Gogotsi and P. Simon, *J. Phys. Chem. Lett.*, 2015, **6**, 2305-2309.
